# Supplementary material
Source: PubMed Central journal article supplement (PMC3525961)
Supplement: NIHMS426394-supplement-1_si_001.pdf [file NIHMS426394-supplement-1_si_001.pdf]

## SUPPORTING INFORMATION

### Oxidation of Methyl and Ethyl Nitrosamines by Cytochromes P450 2E1 and P450 2B1

Goutam Chowdhury, M. Wade Calcutt, Leslie D. Nagy, and F. Peter Guengerich\*

*Biochemistry* **52**, xxx-xxx (2013)

#### TABLE OF CONTENTS

Figure S1. Synthesis of deuterated MEN substrates and <sup>1</sup>H-NMR spectra.

Figure S2. LC-MS of 2,4-dinitrophenyl hydrazone of CH<sub>3</sub>CHO formed from DMN.

Figure S3. Binding spectra of P450 2E1 with DMN and DEN.

Figure S4. DynaFit modeling of theoretical time course of formation of HCHO and HCO<sub>2</sub>H based on  $k_{cat}$  and  $K_m$  values for separate reactions.

Figure S5. Steady-state kinetics of denitrosation products.

Figure S6. Steady-state kinetics of *N*-demethylation of [*d*<sub>4</sub>]-DMN by rat P450 2B1.

Figure S7. HPLC-UV of *N*-nitroso-*N*-methylformamide.

Figure S1. (A) Synthesis of deuterated MEN substrates; (B)  $^1\text{H}$ -NMR spectra. Note splitting of signals in nitrosamines, as discussed earlier.<sup>1</sup>

**A**

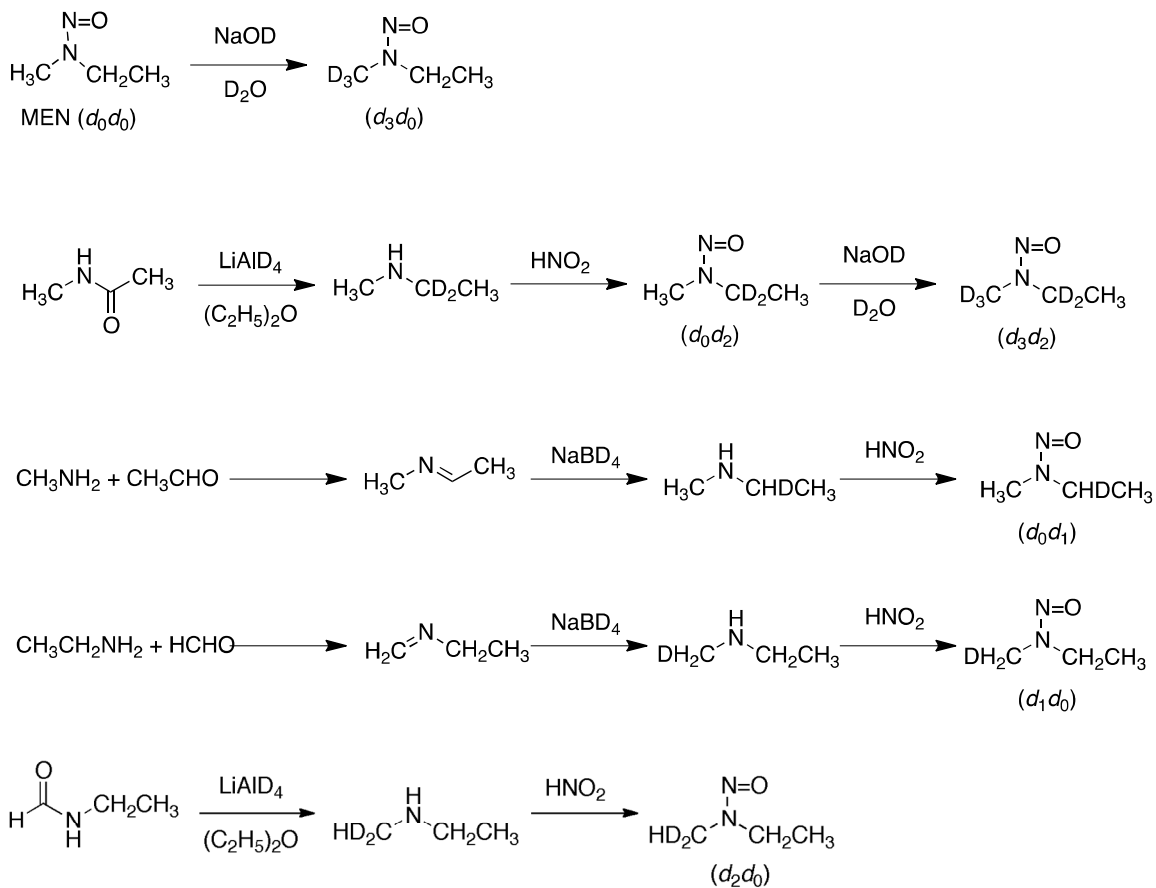

**[ $d_3d_0$ ]-MEN.** MEN (4.15 g, 47 mmol) was dissolved in 50 mL of 0.5 M NaOD in  $\text{D}_2\text{O}$ , which had been prepared by the addition of 0.57 g of  $\text{Na}^\circ$  in 50 mL  $\text{D}_2\text{O}$  (at  $0^\circ\text{C}$ ), with a  $\text{CaSO}_4$  drying tube attached to the reaction flask. The solution was stirred at  $70^\circ\text{C}$  for 48 h. The mixture was cooled to room temperature and the pH (pD) was adjusted to  $\sim 4$  (as judged by indicator paper) with  $\text{D}_3\text{PO}_4$  (prepared by the careful addition of  $\text{P}_2\text{O}_5$  to  $\text{D}_2\text{O}$ ).  $\text{NaCl}$  ( $\sim 12$  g) was dissolved in the aqueous solution, and the solution was extracted three times with an equal volume of  $\text{CHCl}_3$ . The combined organic layers were dried with  $\text{MgSO}_4$  and, after removal of  $\text{MgSO}_4$  by filtration, the  $\text{CHCl}_3$  was evaporated carefully under a stream of  $\text{N}_2$  in a water bath. Yield 77%. MS:  $m/z$  92.3 ( $\text{MH}^+$  for  $d_3$ ). NMR ( $\text{CDCl}_3$ )  $\delta$  1.04 (t,  $-\text{CH}_2\text{CH}_3$ ), 1.95 (t,  $-\text{CH}_2\text{CH}_3$ ), 1.33 (t,  $-\text{CH}_2\text{CH}_3$ ), 2.96 (s, residual  $-\text{CH}_3$ ,  $\leq 3\%$ ), 3.56 (q,  $-\text{CH}_2\text{CH}_3$ ), 4.14 (q,  $-\text{CH}_2\text{CH}_3$ ).

**[ $d_0d_2$ ]-MEN.**  $\text{LiAlD}_4$  (10 g, 0.24 mol) was stirred in 300 mL of dry  $(\text{C}_2\text{H}_5)_2\text{O}$  (freshly opened can) in a 500 mL-round bottom flask, which was stirred and cooled to  $0^\circ\text{C}$  using an ice bath. (All glass had been heated to remove moisture, and a  $\text{CaSO}_4$  drying tube was attached to the system.) *N*-Methylacetamide (17 g, 0.24 mol, dissolved in 60 mL of  $(\text{C}_2\text{H}_5)_2\text{O}$ ), was added from an addition funnel over 1 h. The addition funnel was

replaced with a condenser and the solution was stirred and heated at reflux for 20 h. The reaction was cooled to 0 °C and quenched by the careful addition of 5 mL D<sub>2</sub>O, followed by 5 mL of 15% NaOD in D<sub>2</sub>O (*vide supra*) and then another 5 mL of D<sub>2</sub>O. This mixture was stirred another 17 h. After cooling on ice, the solids were removed by filtration through Celite and washed with another cold 200 mL of (C<sub>2</sub>H<sub>5</sub>)<sub>2</sub>O. The combined filtrate was chilled to 0 °C (ice) and sparged with HCl gas. The resulting CH<sub>3</sub>NHCH<sub>2</sub>CH<sub>3</sub>-HCl was extracted from the (C<sub>2</sub>H<sub>5</sub>)<sub>2</sub>O layer three times with 25 mL of aqueous 2.5 M HCl. The water was removed *in vacuo* (rotary evaporator) to yield a solid, which was dried *in vacuo* (vacuum pump) overnight.

The above compound (moist solid) was dissolved in 60 mL of cold glacial CH<sub>3</sub>CO<sub>2</sub>H and diluted with 30 g ice. The solution was stirred at 0 °C for 1 h, NaNO<sub>2</sub> (35 g, 0.51 mol) was added, and the reaction was stirred for 1.5 h at 0 °C and then overnight at 23 °C. Cold H<sub>2</sub>O (25 mL) and NaCl (10 g) were added, and the product (*d*<sub>0</sub>*d*<sub>2</sub>-MEN) was extracted five times with 25 mL of CHCl<sub>3</sub>. The combined CHCl<sub>3</sub> extracts were dried with MgSO<sub>4</sub> and filtered, and the CHCl<sub>3</sub> was carefully evaporated, under a stream of nitrogen at 23 °C, to give 9.7 g of [*d*<sub>0</sub>*d*<sub>2</sub>]-MEN (46% yield). NMR (CDCl<sub>3</sub>) δ, 0.96 (s, -CD<sub>2</sub>CH<sub>3</sub>), 1.25 (s, -CD<sub>2</sub>CH<sub>3</sub>), 2.93 (s, CH<sub>3</sub>-N), 3.62 (s, 3H, CH<sub>3</sub>-N). The product was further purified by vacuum distillation (bp 50-55 °C, 12 Torr) (6.2 g).

**[*d*<sub>3</sub>*d*<sub>2</sub>]-MEN.** The above product ([*d*<sub>0</sub>*d*<sub>2</sub>]-MEN, 5.7 g, distilled) was exchanged with 100 mL of 0.5 M NaOD in H<sub>2</sub>O as described for [*d*<sub>3</sub>*d*<sub>0</sub>]-MEN (*vide supra*) for 130 h at 70 °C to yield [*d*<sub>3</sub>*d*<sub>2</sub>]-MEN with 98.5% excess atom D. MS: *m/z* 94.3 (MH<sup>+</sup>). NMR (CDCl<sub>3</sub>) δ 1.01 (s, -CD<sub>2</sub>CH<sub>3</sub>), 1.30 (s, -CD<sub>2</sub>CH<sub>3</sub>).

**[*d*<sub>0</sub>*d*<sub>1</sub>]-MEN.** A cold aqueous solution of 40% CH<sub>3</sub>CHO (w/v, 20 mL, 0.18 mol) was added dropwise to 24 mL of a 40% aqueous solution of CH<sub>3</sub>NH<sub>2</sub> on ice, with vigorous stirring. After 2 h, NaOH pellets were added to the mixture until two layers formed, and then a few excess NaOH pellets were added. The mixture, containing the imine (Fig. 2), was transferred to a pre-chilled separatory funnel. The lower aqueous layer was discarded and the upper layer (imine, 16.9 g crude weight) was transferred to a clean round bottom flask and distilled (bp 26-32 °C, 760 Torr) to give 9.2 g of the imine: NMR (CDCl<sub>3</sub>) δ 0.88 (s, 3H, CH<sub>3</sub>-N), 1.81 (s, 3H, =CH-CH<sub>3</sub>), 2.35 (s, residual CH<sub>3</sub>NH<sub>2</sub>), 3.12 (s, unknown). The imine was dissolved in 50 mL C<sub>2</sub>H<sub>5</sub>OH and reduced with 2.0 g of NaBD<sub>4</sub> (0.048 mol, in 100 C<sub>2</sub>H<sub>5</sub>OH), beginning at 0 °C (during addition), heating at 50 °C for 3 h, and then stirring at 23 °C overnight. The resulting *N*-methylethylamine was recovered and nitrosated as described above for [*d*<sub>0</sub>*d*<sub>2</sub>]-MEN. MS: *m/z* 90.2 (MH<sup>+</sup>). NMR (CDCl<sub>3</sub>) δ 1.32 (d, 3H, -CHDC<sub>2</sub>H<sub>3</sub>), 2.98 (s, 3H, CH<sub>3</sub>-N), 3.67 (s, 3H, CH<sub>3</sub>-N), 4.10 (m, 1H, -CHDC<sub>2</sub>H<sub>3</sub>). See Part B for spectrum.

**[*d*<sub>1</sub>*d*<sub>0</sub>]-MEN.** The procedure was similar to that used above for [*d*<sub>1</sub>*d*<sub>0</sub>]-MEN, except that HCHO (20 mL of a 30% solution, w/v) and C<sub>2</sub>H<sub>5</sub>NH<sub>2</sub> (10.3 mL of a 70% aqueous solution) were used as starting materials (Fig. 2). The imine intermediate (crude yield 7.1 g, 45%) was not distilled but was reduced directly with NaBD<sub>4</sub> (4.0 g) in C<sub>2</sub>H<sub>5</sub>OH, with the workup of *N*-methylethylamine and nitrosation as before to yield the final product, *d*<sub>1</sub>*d*<sub>0</sub>-MEN. MS: *m/z* 90.2 (MH<sup>+</sup>).

**[ $d_2d_0$ ]-MEN.** The procedure was similar to that used above for [ $d_0d_2$ ]-MEN (*vide supra*). *N*-Ethylformamide was reduced with  $\text{LiAlD}_4$  and the product was nitrosated in the usual manner. MS:  $m/z$  91.2 ( $\text{MH}^+$ ). NMR ( $\text{CDCl}_3$ )  $\delta$  1.05, 1.34 (t, 3H,  $\text{N-CH}_2\text{CH}_3$ ); 2.97, 3.67 (m, 1H,  $\text{CD}_2\text{H-N}$ ); 3.58, 4.14 (q, 2H,  $\text{N-CH}_2\text{CH}_3$ ).

**B**

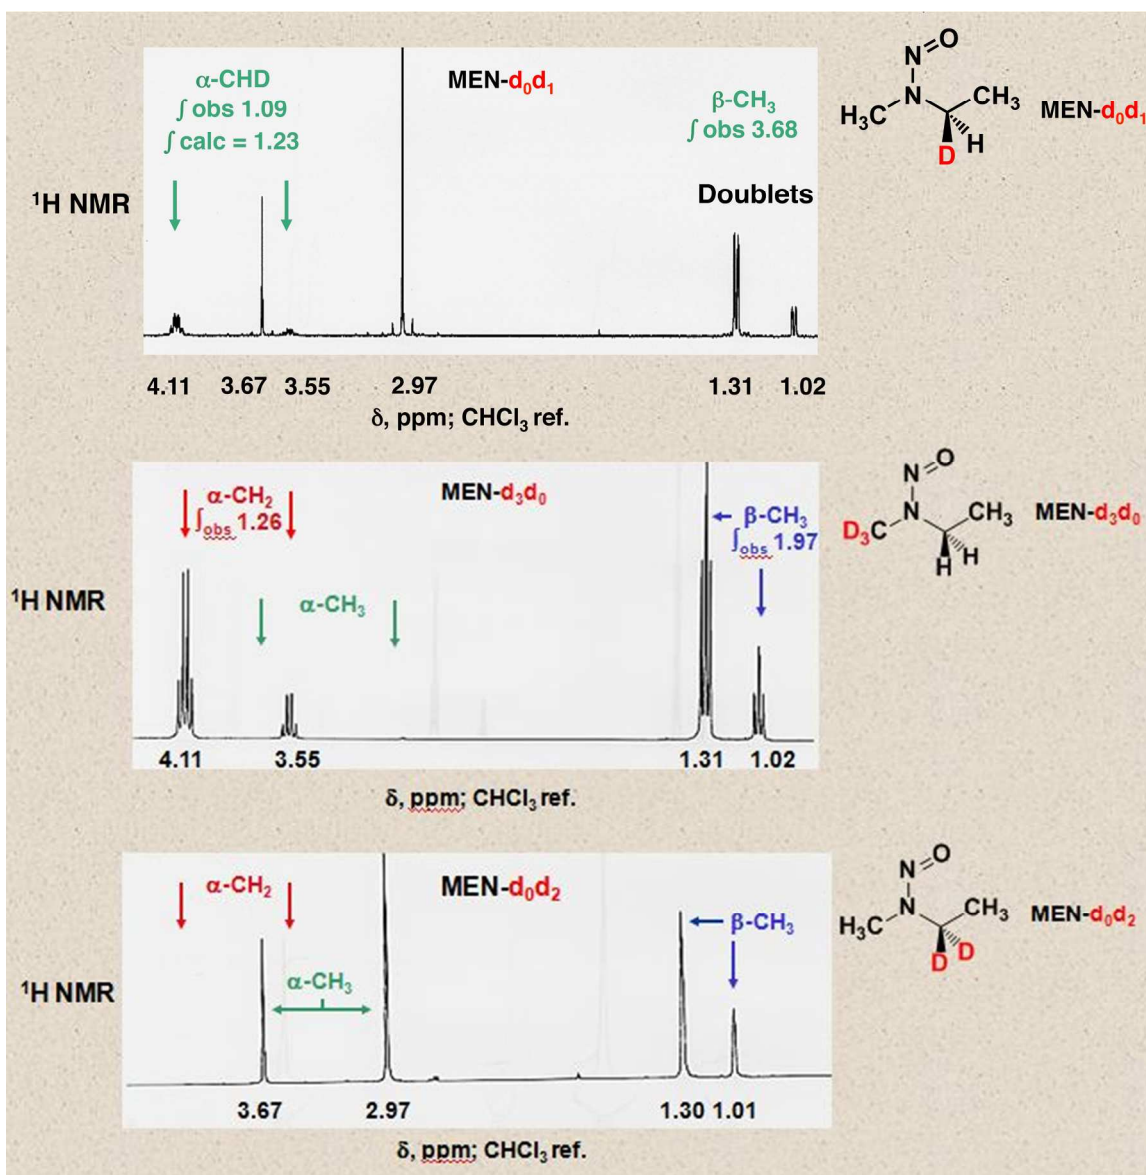

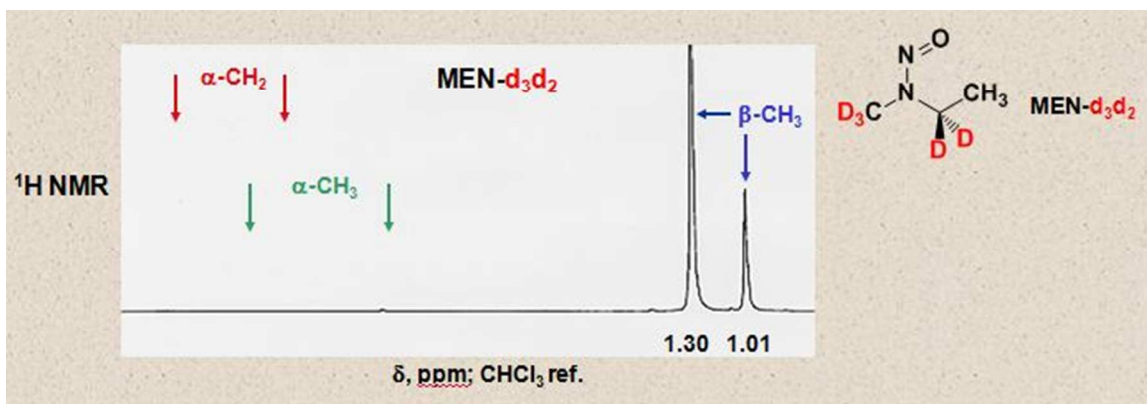

Figure S2. LC-MS of 2,4-dinitrophenyl hydrazone of CH<sub>3</sub>CHO formed from DMN. (A) LC-MS chromatogram and mass spectrum of product obtained from an incubation with *d*<sub>0</sub> DMN. (B) LC-MS chromatogram and mass spectrum of product obtained from an incubation with *d*<sub>6</sub> DMN. (C) LC-MS chromatogram and mass spectrum of product obtained from an incubation with a 1/1 molar mixture of *d*<sub>0</sub> and *d*<sub>6</sub> DMN (competition experiment).

**A**

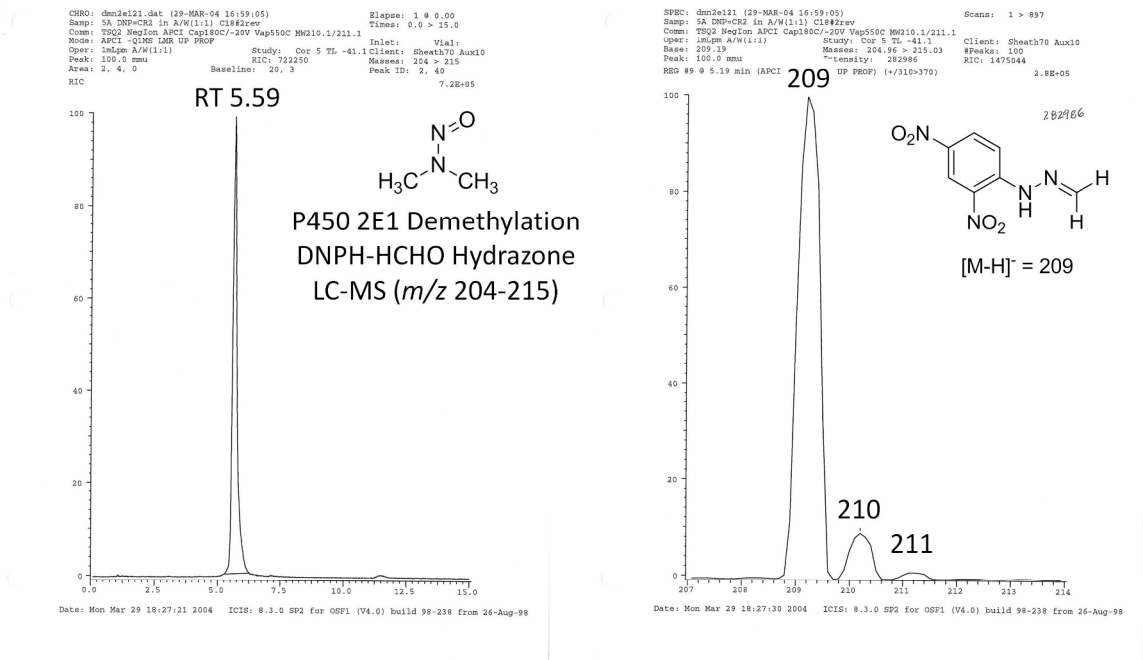

**B**

CHRO: dm2e116.dat (29-MAR-04 15:40:54) Elapse: 1 @ 0.01  
 Samp: 4A DNP+CR2 in A/W(1:1) C18#2rev Times: 0.0 > 15.0  
 Comm: TSO2 NegIon APCI Cap180C/20V Vap550C MM210.1/211.1  
 Mode: APCI -Q1MS LMS UP PROF Inlet: Vial:  
 Oper: 10Lpm A/W(1:1) Study: Cor 5 TL -41.1 Client: Sheath70 Aux10  
 Peak: 100.0 mmu RIC: 134530 Masses: 204 > 215  
 Area: 2.4 C Baseline: 20.3 Peak ID: 2, 40  
 RIC: 1.3E+05

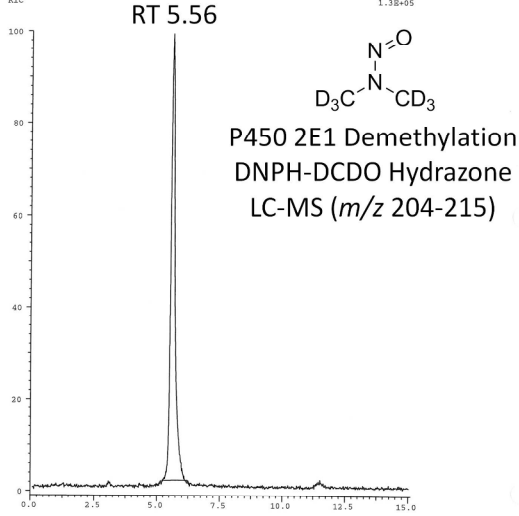

SPRC: dm2e116 (29-MAR-04 15:40:54) Scans: 1 > 897  
 Samp: 4A DNP+CR2 in A/W(1:1) C18#2rev  
 Comm: TSO2 NegIon APCI Cap180C/20V Vap550C MM210.1/211.1 Client: Sheath70 Aux10  
 Mode: APCI -Q1MS LMS UP PROF Inlet: Vial:  
 Oper: 10Lpm A/W(1:1) Study: Cor 5 TL -41.1 Client: Sheath70 Aux10  
 Base: 211.21 Masses: 204.96 > 215.03 #Peaks: 100  
 Peak: 100.0 mmu Intensity: 4.7E+04 RIC: 930749  
 REG #9 @ 5.19 min (APCI -Q1MS LMR UP PROF) (-) 211

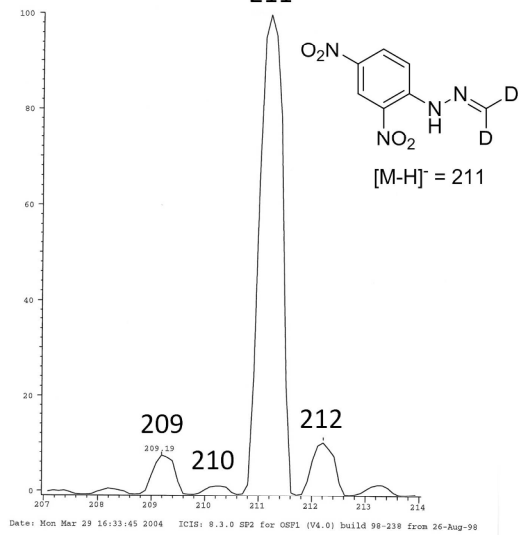**C**

CHRO: dm2e127.dat (29-MAR-04 18:54:38) Elapse: 1 @ 0.02  
 Samp: 1A DNP+CR2 in A/W(1:1) C18#2rev Times: 0.0 > 15.0  
 Comm: TSO2 NegIon APCI Cap180C/20V Vap550C MM210.1/211.1  
 Mode: APCI -Q1MS LMS UP PROF Inlet: Vial:  
 Oper: 10Lpm A/W(1:1) Study: Cor 5 TL -41.1 Client: Sheath70 Aux10  
 Peak: 100.0 mmu RIC: 411247 Masses: 204 > 215  
 Area: 2.4 C Baseline: 20.3 Peak ID: 2, 40  
 RIC: 4.1E+05

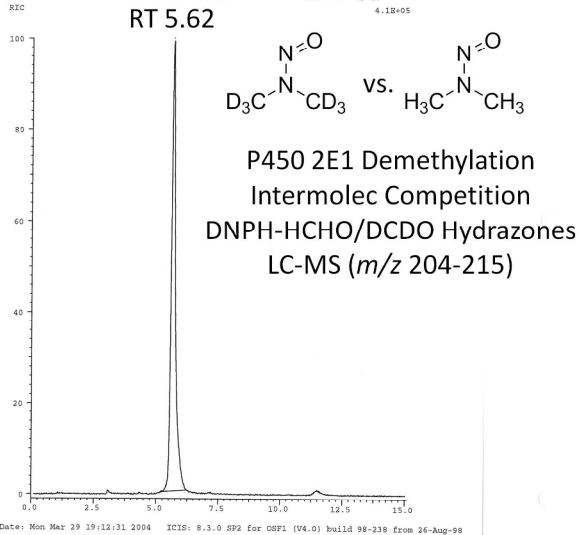

SPRC: dm2e127 (29-MAR-04 18:54:38) Scans: 1 > 453  
 Samp: 1A DNP+CR2 in A/W(1:1) C18#2rev  
 Comm: TSO2 NegIon APCI Cap180C/20V Vap550C MM210.1/211.1 Client: Sheath70 Aux10  
 Mode: APCI -Q1MS LMS UP PROF Inlet: Vial:  
 Oper: 10Lpm A/W(1:1) Study: Cor 5 TL -41.1 Client: Sheath70 Aux10  
 Base: 209.19 Masses: 204.96 > 215.03 #Peaks: 100  
 Peak: 100.0 mmu Intensity: 137824 RIC: 834292  
 REG #9 @ 5.20 min (APCI -Q1MS LMR UP PROF) (+/-)310-370

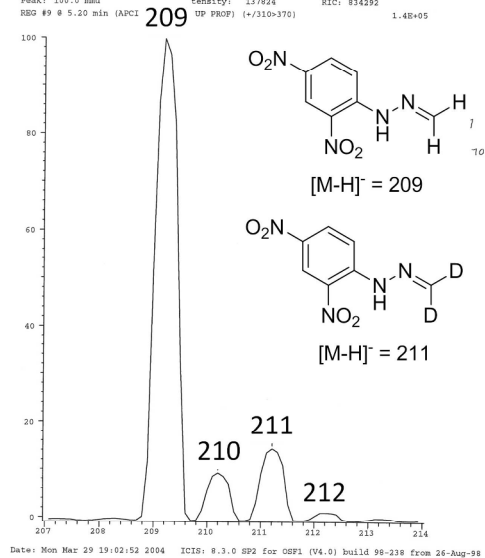

Figure S3. Binding spectra of P450 2E1 with DMN and DEN.<sup>4</sup> Two cuvettes each contained 1.0  $\mu\text{M}$  P450 in 0.10 M potassium phosphate buffer. A baseline was recorded and varying concentrations of the nitrosamine (in  $\text{H}_2\text{O}$ ) were added to the sample cuvette, with the same amount of  $\text{H}_2\text{O}$  added to the reference cuvette. (A) DMN spectra; (B) DEN spectra; (C) plot of absorbance change ( $A_{430}$ ) vs. [DMN]; (D) plot of absorbance change ( $\Delta A_{413}-A_{431}$ ) vs. [DEN]. The  $K_d$  values for DMN and DEN were  $69 (\pm 41)$  and  $0.99 (\pm 0.20)$  mM, respectively.

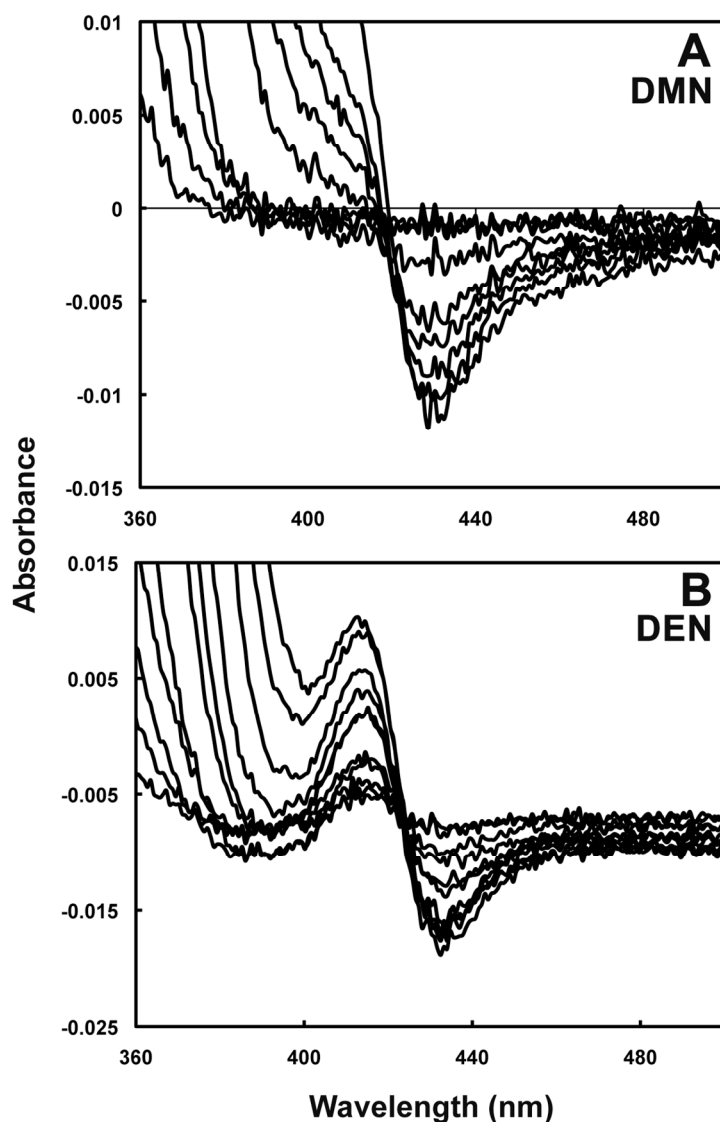



C

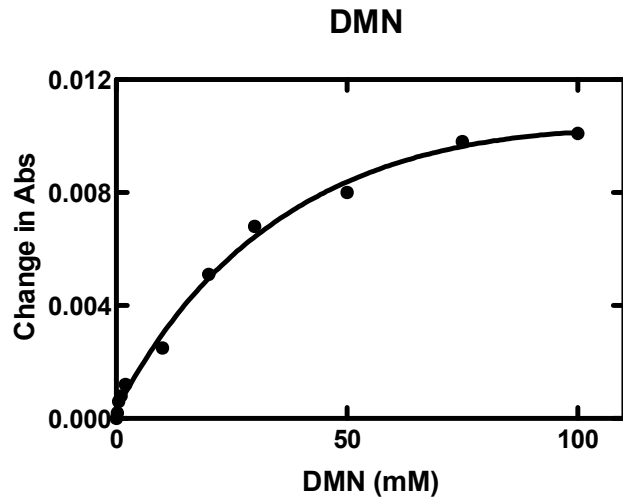

D

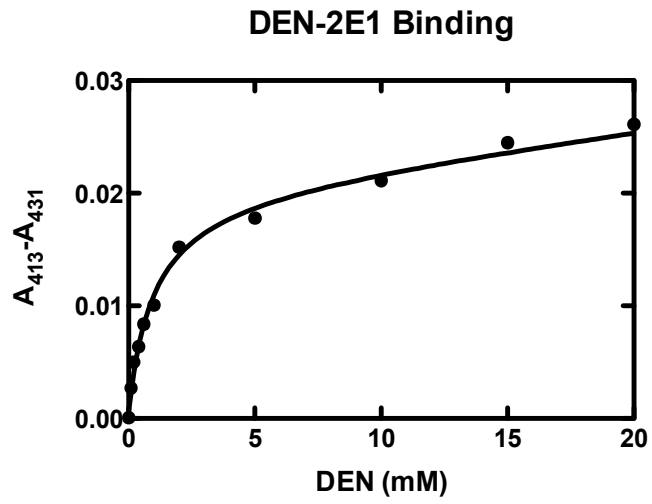

Figure S4. DynaFit modeling<sup>5</sup> of theoretical time courses of formation of aldehydes and carboxylic acids based on  $k_{\text{cat}}$  and  $K_m$  values for separate reactions.

### Script

```
;2E1DAN RUN 3  
;This is a situation in which Km & kcat results are available for several  
;pathways. The goal is to simulate the time course of different products as  
;a function of time.
```

```
; units are min & nM  
; E = P450  
; S = DMN  
; Q = aldehyde  
; P = carboxylic acid  
; Use k = Vmax = kcat  
; Use Km = Kdissoc
```

```
[task]
```

```
data = progress  
task = fit
```

```
[mechanism]
```

```
E + S <=> ES :      K1    dissoc  
ES --> EQ      :      k2  
E + Q <=> EQ :      K3    dissoc  
EQ ---> EP :      k4  
E + P <=> EP :      K5    dissoc
```

```
[constants]
```

```
K1 = 69000000  
k2 = 13.8  
K3 = 1300000  
k4 = 0.72  
K5 = 10000000000
```

```
[sweep]
```

```
[concentrations]
```

```
E = 2500  
S = 1000000
```

```
[progress]
```

mesh linear from 0 to 10 step 0.1

directory ./scripts

```
;variable S  
;file DMNHCO2Htime.txt  
;response S = 1
```

```
variable Q  
file DMNHCO2Htime.txt  
response Q = 1
```

```
variable P  
file DMNHCO2Htime.txt  
response P = 1
```

[output]  
directory ./projects/P4502E1DAN/output/run3

[end]

### **Data file**

DMNHCO2Htime.txt  
(time, in min; concentration, in nM)

|   |     |
|---|-----|
| 0 | 0   |
| 1 | 48  |
| 2 | 53  |
| 3 | 185 |
| 4 | 395 |
| 5 | 280 |
| 6 | 368 |
| 6 | 380 |

### **Differential equations**

$$d[E]/dt = +K1[ES]-dissoc[E][S]+K3[EQ]-dissoc[E][Q]+K5[EP]-dissoc[E][P]$$

$$d[S]/dt = +K1[ES]-dissoc[E][S]$$

$$d[ES]/dt = -K1[ES]+dissoc[E][S]-k2[ES]$$

$$d[EQ]/dt = +k2[ES]-K3[EQ]+dissoc[E][Q]-k4[EQ]$$

$$d[Q]/dt = +K3[EQ]-dissoc[E][Q]$$

$$d[EP]/dt = +k4[EQ]-K5[EP]+dissoc[E][P]$$

$$d[P]/dt = +K5[EP]-dissoc[E][P]$$

Predicted traces (for HCHO (1) and HCO<sub>2</sub>H (2, with data points shown)):

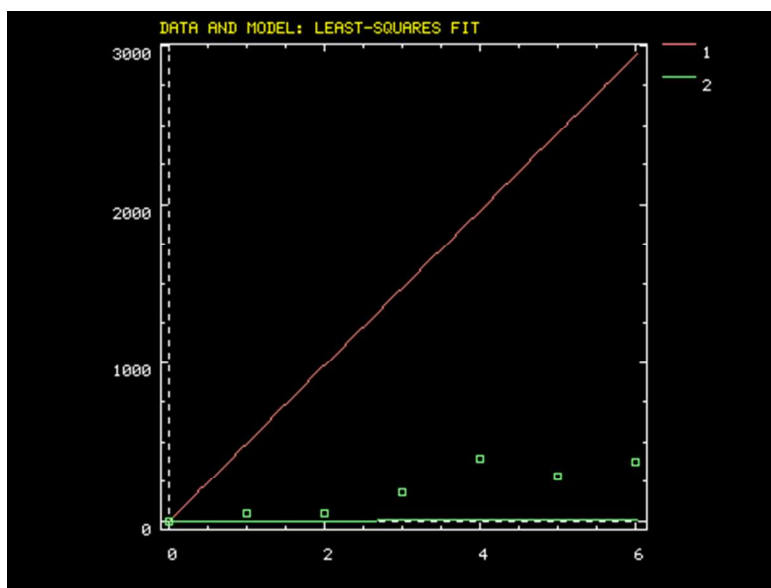

Figure S5. Steady-state kinetics of denitrosation products. Incubations were done for 15 min at 37 °C with 1  $\mu$ M human P450 2E1 in the typical reconstituted system containing NADPH-P450 reductase and  $b_5$ . Analyses of alkylamines<sup>2</sup> and  $\text{NO}_2^-$ <sup>3</sup> are described in more detail under Experimental Procedures. (A) Formation of  $\text{CH}_3\text{NH}_2$  from  $d_0$  and  $d_6$  DMN. (B) Formation of  $\text{NO}_2^-$  from  $d_0$  and  $d_6$  DMN. (C) Formation of  $\text{CH}_3\text{CH}_2\text{NH}_2$  from  $d_0$  and  $d_4$  DEN ( $\text{CH}_3\text{CD}_2\text{N}(\text{NO})\text{CD}_2\text{CH}_3$ ). (D) Formation of  $\text{NO}_2^-$  from  $d_0$  and  $d_4$  DEN ( $\text{CH}_3\text{CD}_2\text{N}(\text{NO})\text{CD}_2\text{CH}_3$ ).

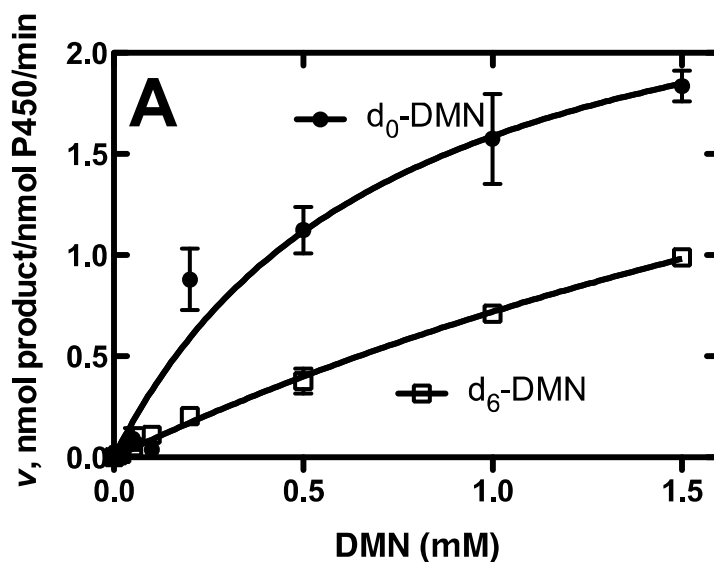

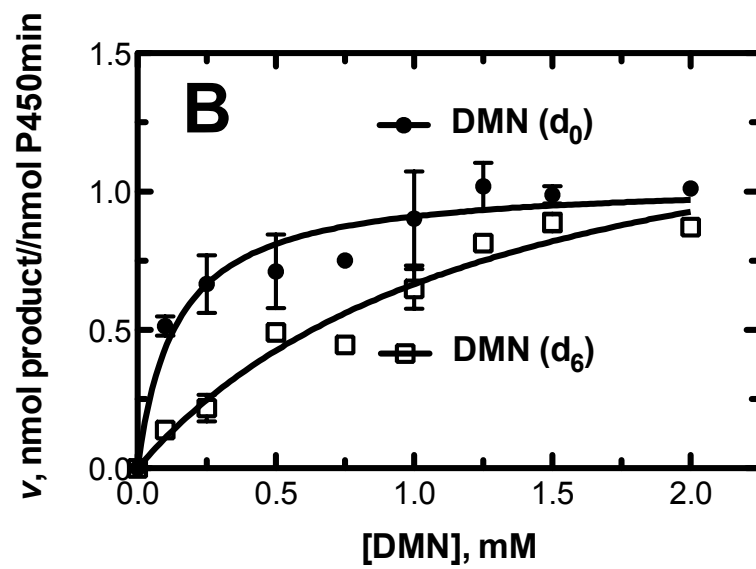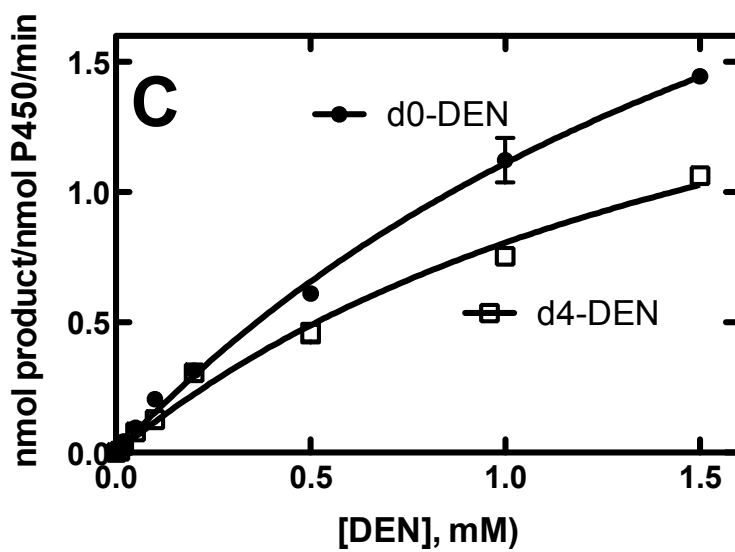

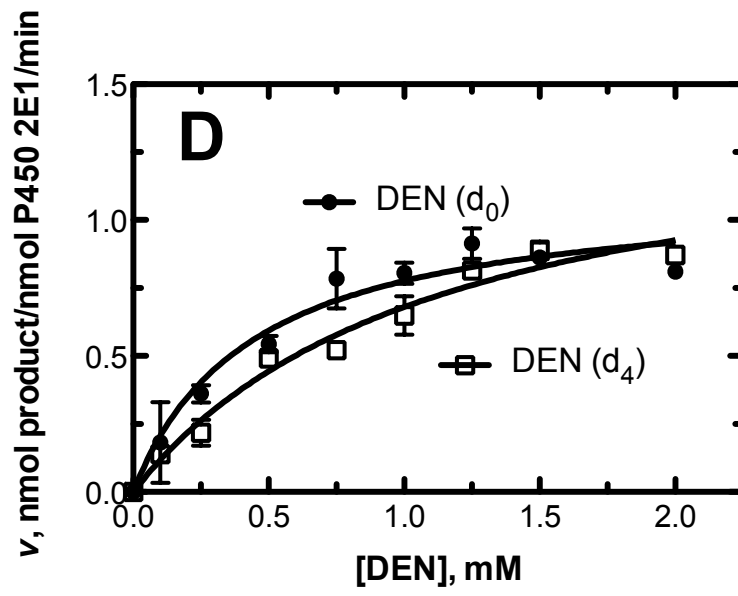

Figure S6. Steady-state kinetics of *N*-demethylation of [*d*<sub>4</sub>]-DMN to formaldehyde by rat P450 2B1. Apparent  $k_{\text{cat}}$   $1.6 \pm 0.2 \text{ min}^{-1}$  (see text for correction for isotopes),  $K_m$   $2.5 \pm 0.5 \text{ mM}$ . Dansyl hydrazone derivatives were analyzed by LC-MS, and the fit is to a hyperbolic (Michaelis-Menten) plot.

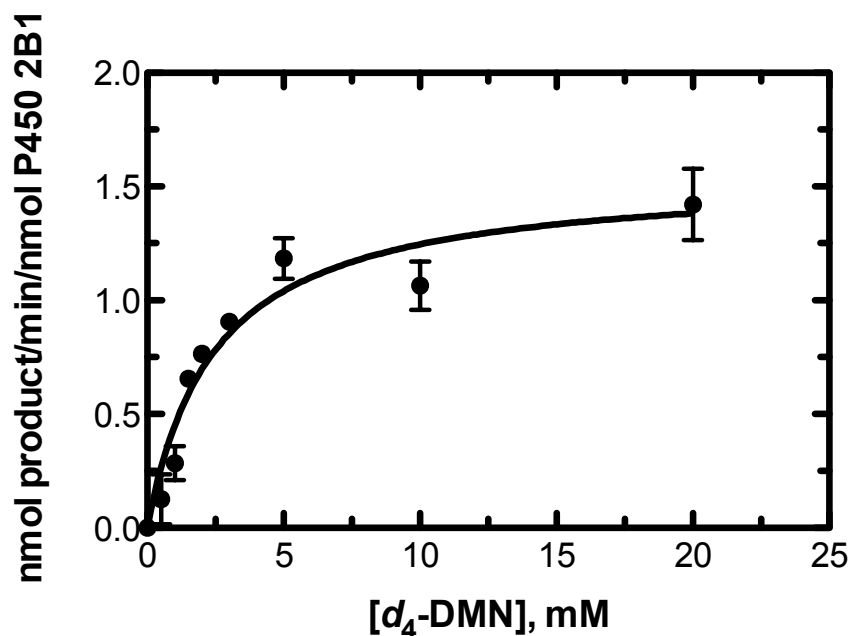

Figure S7. HPLC-UV of *N*-nitroso-*N*-ethylacetamide. UV absorbance at 241 nm was collected and is plotted on the y-axis.

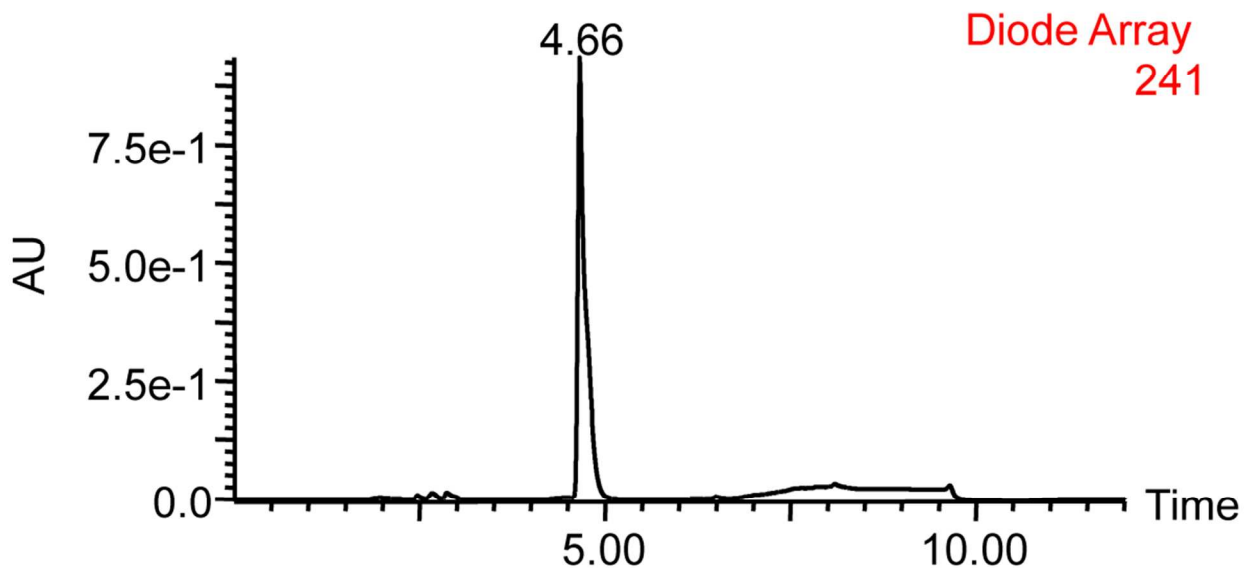

## REFERENCES (for the Supporting Information section)

1. Chowdhury, G., Calcutt, M. W., and Guengerich, F. P. (2010) Oxidation of *N*-nitrosodimethylamine and *N*-nitrosodiethylamine by human cytochrome P450 2A6. Sequential oxidation to carboxylic acids and analysis of reaction steps, *J. Biol. Chem.* **285**, 8031-8044
2. Cha, W., Nalinakumari, B., and Fox, P. (2006) High-performance liquid chromatography for determination of *N*-nitrosodimethylamine in water. Proc. Water Environment Federation, WEFTEC 2006: pp. 889-900 (12), Water Environment Federation, Alexandria, VA ([www.environmental-expert.com/Files/5306/articles/8712/065.pdf](http://www.environmental-expert.com/Files/5306/articles/8712/065.pdf)).
3. Lorr, N. A., Tu, Y. Y., and Yang, C. S. (1982) The nature of nitrosamine denitrosation by rat liver microsomes. *Carcinogenesis* **3**, 1039-1043.
4. Schenkman, J. B., Remmer, H., and Estabrook, R. W. (1967) Spectral studies of drug interaction with hepatic microsomal cytochrome P-450, *Mol. Pharmacol.* **3**, 113-123
5. Kuzmic, P. (1996) Program DYNAFIT for the analysis of enzyme kinetic data: application to HIV protease, *Anal. Biochem.* **237**, 260-273
